# Supplementary material
Source: bioRxiv or medRxiv preprint supplement (https://www.biorxiv.org/highwire/filestream/115769/field_highwire_adjunct_files/5/381525-6.pdf)
Supplement: Supplementary file [file 381525-6.pdf]

## SUPPLEMENTAL TABLE 4: ATF6 protein vs ALLC interactions

| Gene     | Log2 FC<br>ATF6<br>Protein<br>Levels | Log2 FC<br>ATF6 ALLC<br>Interactions |
|----------|--------------------------------------|--------------------------------------|
| STT3A    | -0.0218284                           | -0.2367256                           |
| RPN1     | 0.08432027                           | 0.07273628                           |
| LMAN1    | -0.0989134                           | -0.0489813                           |
| DNAJC10  | 0.29954519                           | 0.00635551                           |
| MANF     | 0.68213076                           | 0.37499431                           |
| ERP44    | 0.18392966                           | 0.27587367                           |
| CALR     | 1.18335819                           | 0.51250142                           |
| P4HB     | 0.4109904                            | 0.27821633                           |
| HSPA5    | 1.95990659                           | 1.35194796                           |
| PDIA4    | 1.68363629                           | 1.17298451                           |
| DNAJB11  | 0.53748739                           | 0.677796                             |
| HYOU1    | 1.06613561                           | 0.85932524                           |
| PDIA6    | 0.83473142                           | 0.39117367                           |
| CCT6A    | -0.093568                            | -0.2163772                           |
| MOGS     | -0.0432536                           | -0.4471366                           |
| ERLIN2   | -0.0727224                           | -0.3025181                           |
| UGGT1    | 0.21445368                           | 0.01911607                           |
| DNAJC3   | 0.7363107                            | 0.02938914                           |
| LGALS3BP | 0.10910659                           | -0.0965576                           |
| GOLM1    | -0.1987519                           | -0.1536109                           |
| CPD      | 0.06664111                           | -0.0823148                           |
| TUBA1A   | -0.3231896                           | 0.32612999                           |
| PRDX4    | -0.0322718                           | -0.1918099                           |
| SRP72    | -0.0127873                           | -0.0561514                           |
| RCN2     | -0.0210398                           | 0.36211578                           |
| SRP9     | -0.0069026                           |                                      |
| CKAP4    | -0.0459996                           | -0.0871542                           |
| HSP90B1  | 2.02055736                           | 1.07467613                           |
| SERPINH1 | -0.0367906                           | -0.0369296                           |
| HSPA1L   | 0.08772394                           | 0.46934009                           |
| GLG1     | -0.3205517                           | -0.1146621                           |
| AHCY     | -0.1452706                           | -0.1555227                           |
| GANAB    | -0.100052                            | -0.1938754                           |
| THUMPD1  | -0.0853052                           |                                      |
| ERP29    | -0.0956152                           | -0.5144018                           |
| DDOST    | -0.0472505                           | -0.2361856                           |
| DYNC1H1  | -0.0178049                           | 0.02022044                           |
| PDIA3    | 0.59685701                           | 0.26780029                           |
| PDCD5    | -0.1261054                           | 0.16507538                           |
| P4HA1    | -0.1758361                           | -0.3309932                           |
| RPN2     | 0.27217228                           | -0.1491554                           |
| CNPY2    | 0.02843913                           | -0.0750459                           |
| FKBP10   | -0.1879372                           | -0.5365252                           |
| CALU     | -0.1965976                           | -0.0941881                           |
| TFRC     | 0.03755171                           | 0.06488215                           |
| PPIB     | 0.18692212                           | 0.04496339                           |
| TMX1     | -0.1337478                           | 0.0195013                            |
| ERLIN1   | -0.0239486                           | -0.2458944                           |
| MAN2A1   | 0.04258563                           | 0.02493546                           |
| SRSF1    | -0.0902872                           | 0.27924072                           |
| TLN1     | -0.035465                            | -0.407307                            |
| TXNDC5   | -0.0928034                           | 0.05941681                           |
| RCN1     | -0.1023789                           | 0.00999594                           |
| PRKCSH   | -0.1078268                           | 0.02042455                           |
| HSPA2    | -0.1005549                           | -0.1663937                           |
| NCLN     | -0.0411886                           | -0.2793133                           |
| CANX     | 0.40916896                           | 0.07130106                           |
| PLOD3    | -0.0197936                           | -0.0872586                           |
| ACLY     | -0.0620147                           | 0.30469313                           |
| RPL34    | 0.09906363                           | -0.3937174                           |
| PLOD1    | -0.1557291                           |                                      |
